# Supplementary material for: Community-integrated multi-omics facilitates screening and isolation of the organohalide dehalogenation microorganism
Source: PubMed Central journal article supplement — Innovation (Camb). 2022 Nov 22;4(1):100355. doi: 10.1016/j.xinn.2022.100355 (PMC9730224; doi:10.1016/j.xinn.2022.100355), 2022-11-22
Supplement: mmc1.pdf [file mmc1.pdf]

**The Innovation, Volume 4**

**Supplemental Information**

**Community-integrated multi-omics facilitates screening and isolation  
of the organohalide dehalogenation microorganism**

**Yiqun Huang, Lingyu Wen, Lige Zhang, Jijun Xu, Weiwei Wang, Haiyang Hu, Ping  
Xu, Zhao Li, and Hongzhi Tang**

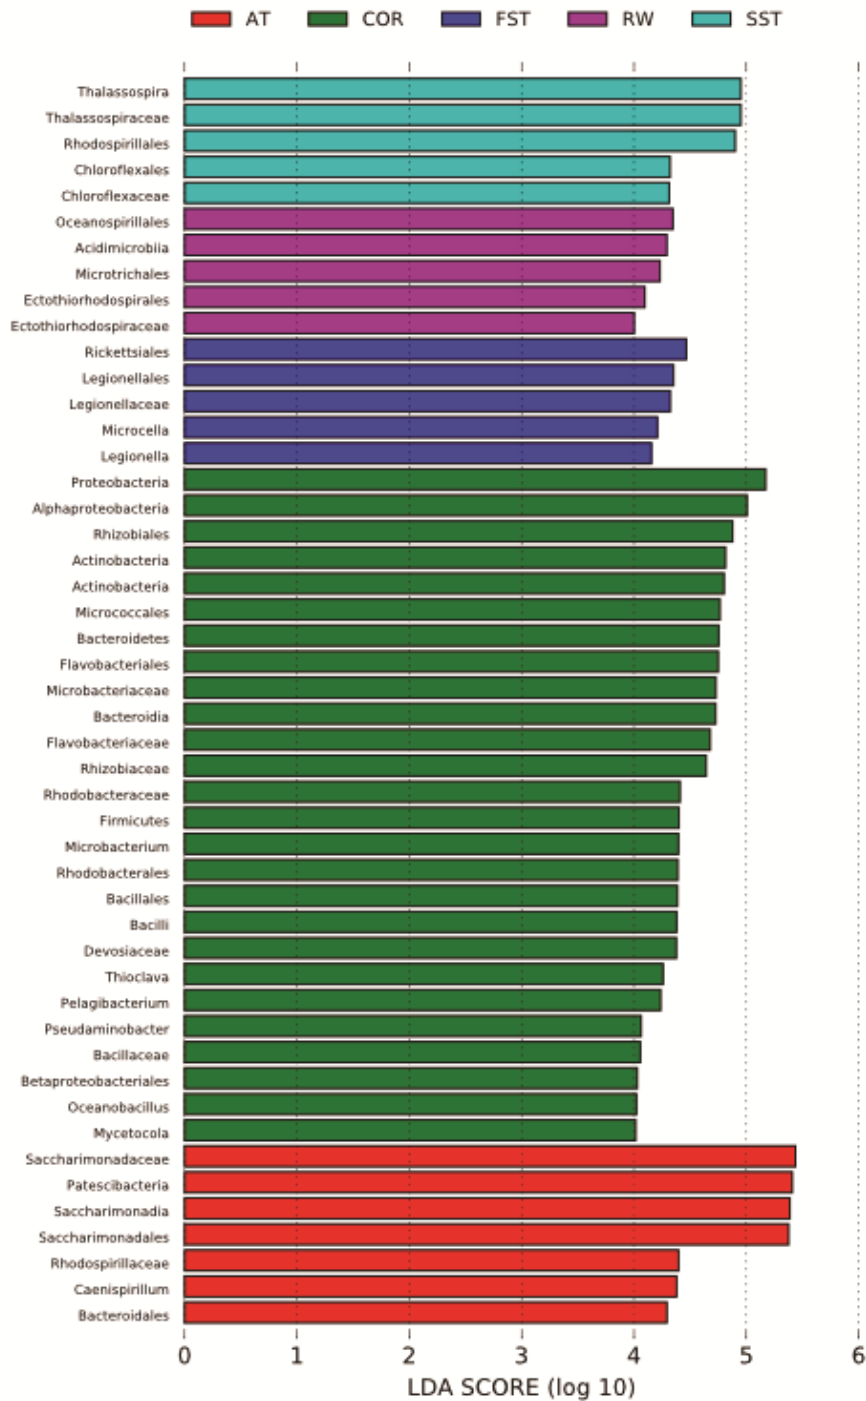

Figure S1. LefSe results of wastewater treatment process. Linear discriminant analysis effect size (LefSe) analysis of the wastewater treatment process (LDA score > 4,  $p < 0.05$ ). The indicated genera having statistically significant differences between distinct phases of the full process of wastewater treatment.

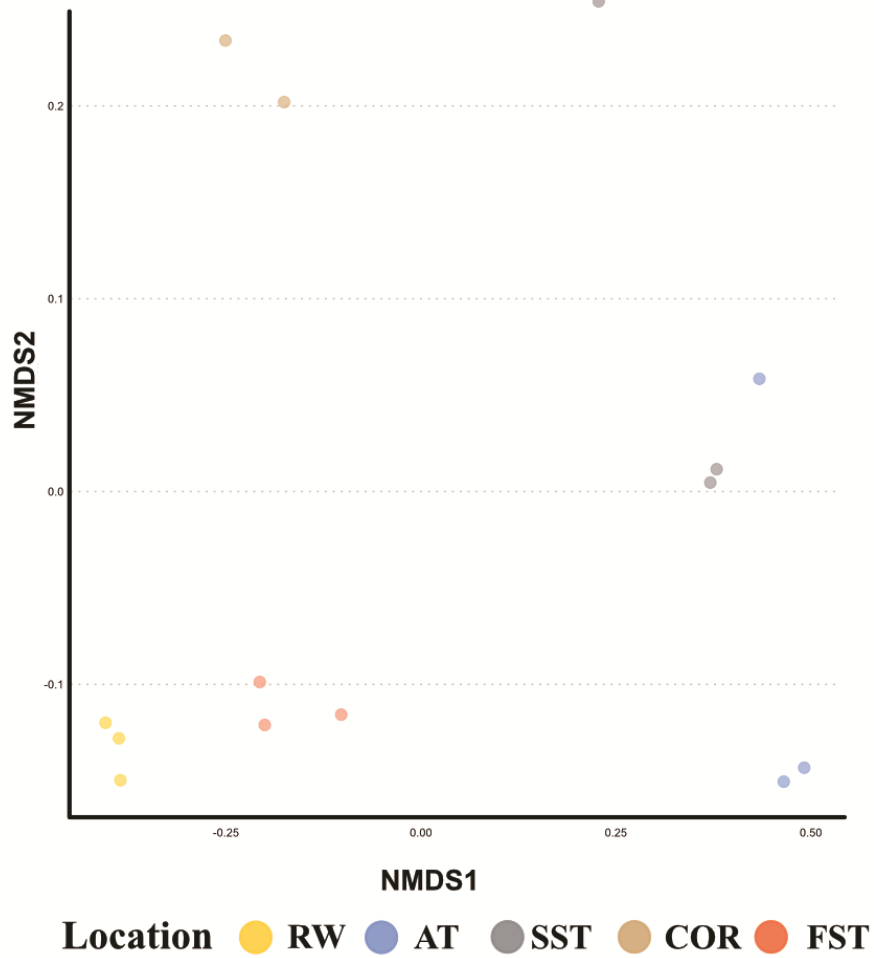

Figure S2. Beta diversity of wastewater treatment process.  
Beta diversity of microbial community during the wastewater treatment process. The separation of wastewater treatment phases shows the difference in the composition of the microbial community.

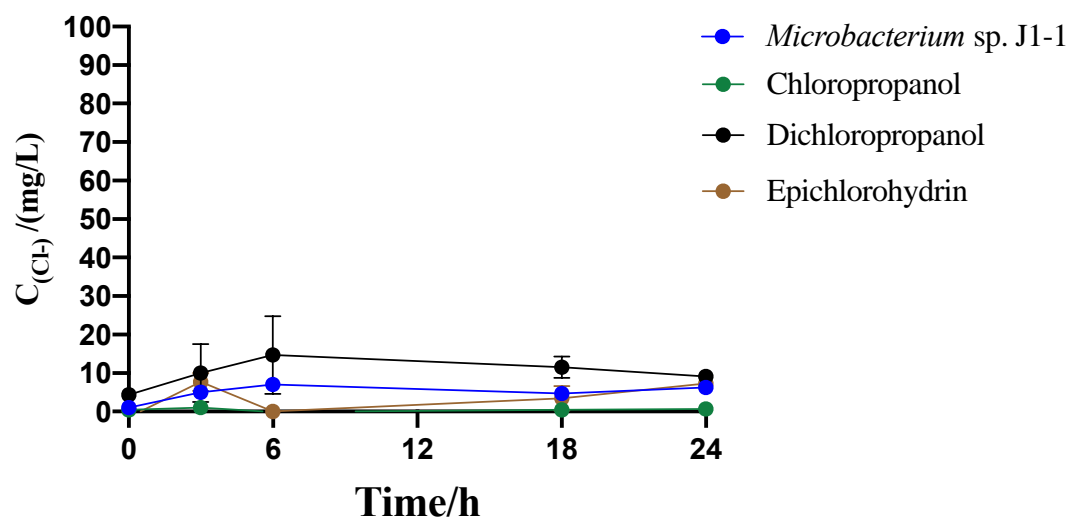

Figure S3. The halogen ion concentration of control group in 24 hours. Blue: The halogen ion concentration of *Microbacterium* sp. J1-1 without organohalide substrates in the reaction system. Green, Black, Brown: The halogen ion concentration of organohalides without *Microbacterium* sp. J1-1 in the reaction system.

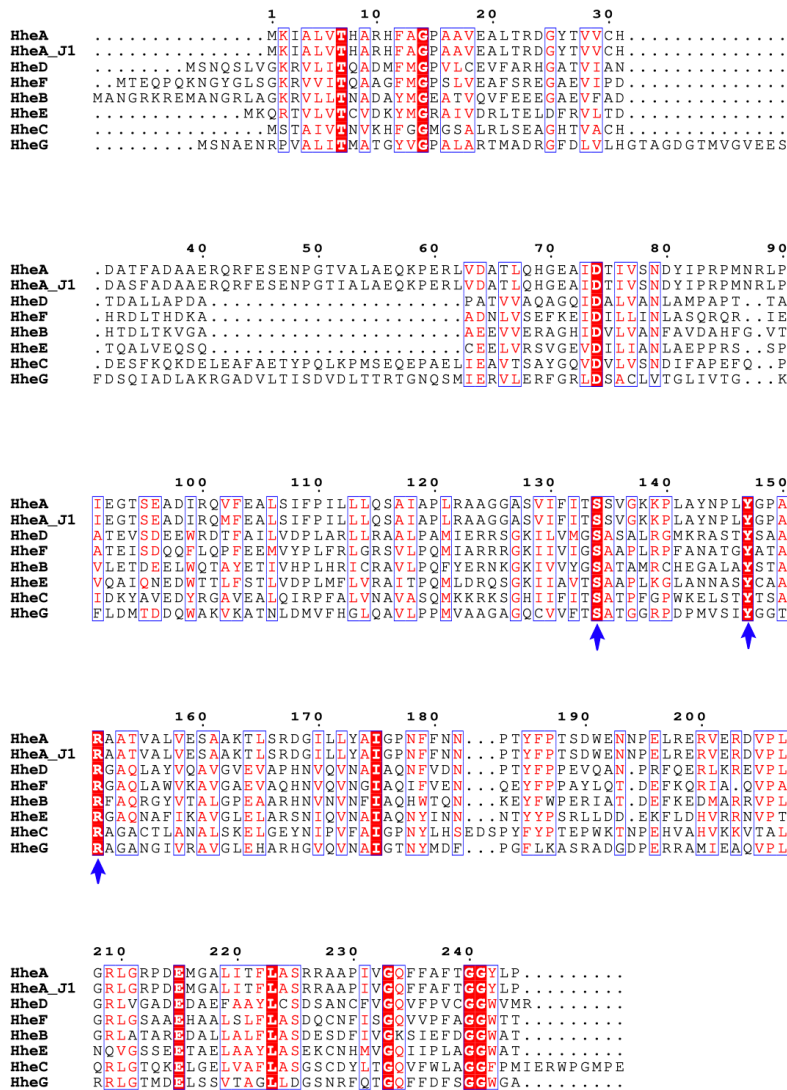

Figure S4 Amino acid sequence alignment of halohydrin dehalogenases. HheA: The halohydrin dehalogenase from *Corynebacterium* sp. Strain N-1074 (GenBank Accession BAA14361.1). HheB: The halohydrin dehalogenase from *Mycobacterium* sp. GP1 (GenBank Accession AAK73175.1). HheC: The halohydrin dehalogenase from *Agrobacterium tumefaciens* (GenBank Accession AAK92099.1). HheA\_J1: The putative halohydrin dehalogenase from *Microbacterium* sp. J1-1. HheD: Halohydrin dehalogenase (GenBank Accession AMQ13565.1). HheE: Halohydrin dehalogenase (GenBank Accession AMQ13570.1). HheF: Halohydrin dehalogenase (GenBank Accession AMQ13575.1). HheG: Halohydrin dehalogenase (GenBank Accession AMQ13576.1). Blue arrow: the conserve catalytic triad (Ser-Tyr-Arg) of halohydrin dehalogenases.

---

```

1      10      20      30      40      50      60
HheA   MKIALVTHARHFAGPAAVEALRDGYTVVCHDAIFADAAERQRFESENPGTVALAEQKPE
HheA_J1 MKIALVTHARHFAGPAAVEALRDGYTVVCHDAIFADAAERQRFESENPGTVALAEQKPE
HheA-AD2 MKIALVTHARHFAGPAAVEALRDGYTVVCHDAIFADAAERQRFESENPGTVALAEQKPE

70      80      90      100     110     120
HheA   RLVDATLQHGEAIDTIVSNDYIPRPMNRLPEGTSEADIRQVFEALSIFPILLQSAIAP
HheA_J1 RLVDATLQHGEAIDTIVSNDYIPRPMNRLPEGTSEADIRQVFEALSIFPILLQSAIAP
HheA-AD2 RLVDATLQHGEAIDTIVSNDYIPRPMNRLPEGTSEADIRQVFEALSIFPILLQSAIAP

130     140     150     160     170     180
HheA   LRAAGGASVIFITSSVGKKPLAYNPLYGPAAATVALVESAAKTLSRDGILLYAIGPNFF
HheA_J1 LRAAGGASVIFITSSVGKKPLAYNPLYGPAAATVALVESAAKTLSRDGILLYAIGPNFF
HheA-AD2 LRAAGGASVIFITSSVGKKPLAYNPLYGPAAATVALVESAAKTLSRDGILLYAIGPNFF

190     200     210     220     230     240
HheA   NNPTYFPTSDWENNELRERVDRDVP LGR LGRPDEM GALITFLASRRAAPIVGQFFAFTG
HheA_J1 NNPTYFPTSDWENNELRERVDRDVP LGR LGRPDEM GALITFLASRRAAPIVGQFFAFTG
HheA-AD2 NNPTYFPTSDWENNELRERVDRDVP LGR LGRPDEM GALITFLASRRAAPIVGQFFAFTG

HheA   GYLP
HheA_J1 GYLP
HheA-AD2 GYLP

```

---

Figure S5 Amino acid sequence alignment of halohydrin dehalogenases of HheA halohydrin dehalogenases.

HheA: The halohydrin dehalogenase from *Corynebacterium* sp. Strain N-1074 (GenBank Accession BAA14361.1). HheA-AD2: The halohydrin dehalogenase from *Arthrobacter* sp. AD2 (GenBank Accession AAK92100.1). HheA\_J1: The putative halohydrin dehalogenase from *Microbacterium* sp. J1-1.

---

Table S1 Organohalide sewage information

The physical and chemical data of organohalide sewage at different locations.

| Location                     | Temperature (°C) | pH      | COD (mg/L)  | Cl <sup>-</sup> (mg/L) |
|------------------------------|------------------|---------|-------------|------------------------|
| Raw water                    | 50               | >11.7   | 1,100–1,200 | 24,000–26,000          |
| Aeration tank                | 35–38            | 6.5–6.9 | 280–330     | 23,000–24,000          |
| Secondary sedimentation tank | 33–36            | 6.5–6.9 | 230–250     | 23,000–24,000          |
| Contact oxidation reactor    | 28–30            | 6.5–6.9 | 60–100      | 23,000–24,000          |
| Final sedimentation tank     | 25–30            | 6.5–6.9 | 30–50       | 23,000–24,000          |

COD (Chemical oxygen demand): The amount of oxygen required for the chemical oxidation of organic compounds to inorganic products.

Table S2. Alpha diversity of organohalide sewage  
The alpha diversity data of organohalide sewage at different locations.

|                              | Simpson  | Chao1   | ACE     | Shannon |
|------------------------------|----------|---------|---------|---------|
| Raw water                    | 0.986774 | 1353.00 | 1353.00 | 8.36    |
|                              | 0.985574 | 1371.00 | 1371.00 | 8.35    |
|                              | 0.988694 | 1468.00 | 1468.00 | 8.49    |
| Aeration tank                | 0.537006 | 583.29  | 589.89  | 2.97    |
|                              | 0.582560 | 496.33  | 525.56  | 3.17    |
|                              | 0.689960 | 451.00  | 451.00  | 3.61    |
| Secondary sedimentation tank | 0.701489 | 818.62  | 821.35  | 3.77    |
|                              | 0.735157 | 713.46  | 719.90  | 3.82    |
|                              | 0.942809 | 923.96  | 947.80  | 6.22    |
| Contact oxidation reactor    | 0.982210 | 1152.00 | 1152.00 | 7.52    |
|                              | 0.974757 | 1447.00 | 1447.00 | 7.84    |
|                              | 0.982094 | 1224.00 | 1224.00 | 7.71    |
| Final sedimentation tank     | 0.973534 | 1529.66 | 1625.21 | 7.55    |
|                              | 0.971725 | 1262.00 | 1262.00 | 7.54    |
|                              | 0.953481 | 1404.33 | 1374.26 | 6.70    |



Table S3. Quality evaluation of MAGs

The detailed information for completeness, contamination of MAG quality via MetaWRAP.

| Location                  | Bin    | Completeness | Contamination |
|---------------------------|--------|--------------|---------------|
| Aeration tank             | bin.10 | 95.93        | 0.949         |
| Aeration tank             | bin.11 | 86.17        | 2.482         |
| Aeration tank             | bin.12 | 99.18        | 1.434         |
| Aeration tank             | bin.13 | 91.39        | 1.728         |
| Aeration tank             | bin.14 | 98.65        | 0.223         |
| Aeration tank             | bin.15 | 93.25        | 3.184         |
| Aeration tank             | bin.16 | 99.41        | 0.904         |
| Aeration tank             | bin.17 | 75.86        | 0             |
| Aeration tank             | bin.18 | 78.31        | 1.41          |
| Aeration tank             | bin.19 | 92.18        | 4.545         |
| Aeration tank             | bin.1  | 74.14        | 0             |
| Aeration tank             | bin.20 | 73.93        | 0.561         |
| Aeration tank             | bin.21 | 77.43        | 1.442         |
| Aeration tank             | bin.22 | 99.5         | 0             |
| Aeration tank             | bin.23 | 98.75        | 0.069         |
| Aeration tank             | bin.24 | 74.82        | 0             |
| Aeration tank             | bin.25 | 99.05        | 1.342         |
| Aeration tank             | bin.26 | 93.93        | 0.202         |
| Aeration tank             | bin.27 | 86.24        | 4.267         |
| Aeration tank             | bin.28 | 73.48        | 3.636         |
| Aeration tank             | bin.29 | 93.76        | 1.006         |
| Aeration tank             | bin.2  | 76.3         | 2.808         |
| Aeration tank             | bin.30 | 99           | 2.093         |
| Aeration tank             | bin.3  | 77.41        | 0.172         |
| Aeration tank             | bin.4  | 72.36        | 1.123         |
| Aeration tank             | bin.5  | 94.15        | 0.802         |
| Aeration tank             | bin.6  | 88.36        | 2.075         |
| Aeration tank             | bin.7  | 98.3         | 4.538         |
| Aeration tank             | bin.8  | 93.75        | 2.875         |
| Aeration tank             | bin.9  | 93.83        | 2.525         |
| Contact oxidation reactor | bin.10 | 70.29        | 1.98          |
| Contact oxidation reactor | bin.11 | 96.16        | 2.003         |
| Contact oxidation reactor | bin.12 | 95.49        | 0.315         |
| Contact oxidation reactor | bin.13 | 94.36        | 1.692         |
| Contact oxidation reactor | bin.14 | 95.59        | 3.048         |
| Contact oxidation reactor | bin.15 | 98.87        | 0.277         |
| Contact oxidation reactor | bin.16 | 98.77        | 0.081         |

---

|                           |        |       |       |
|---------------------------|--------|-------|-------|
| Contact oxidation reactor | bin.17 | 77.95 | 1.638 |
| Contact oxidation reactor | bin.18 | 81.96 | 4.186 |
| Contact oxidation reactor | bin.19 | 99.05 | 0.599 |
| Contact oxidation reactor | bin.1  | 74.14 | 0     |
| Contact oxidation reactor | bin.20 | 90.52 | 3.478 |
| Contact oxidation reactor | bin.21 | 94.2  | 3.62  |
| Contact oxidation reactor | bin.22 | 96.99 | 1.227 |
| Contact oxidation reactor | bin.23 | 74.88 | 2.247 |
| Contact oxidation reactor | bin.24 | 95.94 | 0.19  |
| Contact oxidation reactor | bin.25 | 89.98 | 1.287 |
| Contact oxidation reactor | bin.26 | 84.45 | 1.724 |
| Contact oxidation reactor | bin.27 | 100   | 0.54  |
| Contact oxidation reactor | bin.28 | 99.28 | 0     |
| Contact oxidation reactor | bin.29 | 98.24 | 0.66  |
| Contact oxidation reactor | bin.2  | 97.81 | 0.757 |
| Contact oxidation reactor | bin.30 | 72.93 | 1.123 |
| Contact oxidation reactor | bin.31 | 96.62 | 0     |
| Contact oxidation reactor | bin.32 | 80.78 | 2.777 |
| Contact oxidation reactor | bin.33 | 92.69 | 1.298 |
| Contact oxidation reactor | bin.34 | 96.32 | 1.308 |
| Contact oxidation reactor | bin.35 | 96.44 | 1.421 |
| Contact oxidation reactor | bin.36 | 95.29 | 1.219 |
| Contact oxidation reactor | bin.37 | 74.68 | 3.097 |
| Contact oxidation reactor | bin.38 | 93.73 | 1.698 |
| Contact oxidation reactor | bin.39 | 94.76 | 0.048 |
| Contact oxidation reactor | bin.3  | 96.87 | 3.415 |
| Contact oxidation reactor | bin.40 | 93.85 | 0.433 |
| Contact oxidation reactor | bin.41 | 75.86 | 0     |
| Contact oxidation reactor | bin.42 | 99.91 | 0.144 |
| Contact oxidation reactor | bin.43 | 95.65 | 1.536 |
| Contact oxidation reactor | bin.44 | 86.09 | 1.047 |
| Contact oxidation reactor | bin.45 | 93.29 | 0.42  |
| Contact oxidation reactor | bin.46 | 93.01 | 1.208 |
| Contact oxidation reactor | bin.47 | 70.8  | 0.102 |
| Contact oxidation reactor | bin.48 | 90.13 | 2.452 |
| Contact oxidation reactor | bin.49 | 92.41 | 0.505 |
| Contact oxidation reactor | bin.4  | 72.28 | 1.937 |
| Contact oxidation reactor | bin.50 | 97.53 | 1.498 |
| Contact oxidation reactor | bin.51 | 81.46 | 1.477 |
| Contact oxidation reactor | bin.52 | 99.64 | 2.456 |
| Contact oxidation reactor | bin.53 | 71    | 1.724 |
| Contact oxidation reactor | bin.54 | 72.41 | 1.724 |
| Contact oxidation reactor | bin.55 | 97.01 | 3.755 |

---

---

|                           |        |       |       |
|---------------------------|--------|-------|-------|
| Contact oxidation reactor | bin.56 | 97.27 | 0.414 |
| Contact oxidation reactor | bin.57 | 75.33 | 4.286 |
| Contact oxidation reactor | bin.58 | 93.74 | 1.403 |
| Contact oxidation reactor | bin.59 | 99.41 | 1.462 |
| Contact oxidation reactor | bin.5  | 88.5  | 4.57  |
| Contact oxidation reactor | bin.60 | 93.66 | 0.706 |
| Contact oxidation reactor | bin.61 | 95.79 | 0     |
| Contact oxidation reactor | bin.62 | 77.01 | 2.945 |
| Contact oxidation reactor | bin.63 | 94.48 | 0.755 |
| Contact oxidation reactor | bin.64 | 97.34 | 0.497 |
| Contact oxidation reactor | bin.6  | 76.89 | 0     |
| Contact oxidation reactor | bin.7  | 98.45 | 1.111 |
| Contact oxidation reactor | bin.8  | 90.61 | 0     |
| Contact oxidation reactor | bin.9  | 96.78 | 0.301 |

---

Table S4. Taxonomic assignment results of AT MAGs  
The taxonomic assignment results of AT MAGs via GTDB-tk

| Genome | Phylum                  | Class                      | Order                      | Family                      | Genus                 | Species             |
|--------|-------------------------|----------------------------|----------------------------|-----------------------------|-----------------------|---------------------|
| bin.5  | <i>Actinobacteriota</i> | <i>Actinobacteria</i>      | <i>Propionibacteriales</i> | <i>Propionibacteriaceae</i> | <i>Tessaracoccus</i>  | <i>lapidicaptus</i> |
| bin.3  | <i>Thermotogota</i>     | <i>Thermotogae</i>         | <i>Petrotogales</i>        | <i>Petrotogaceae</i>        | <i>Petrotoga</i>      | <i>mobilis</i>      |
| bin.13 | <i>Bacteroidota</i>     | <i>Bacteroidia</i>         | <i>Flavobacteriales</i>    | koll-22                     | UBA5081               | sp002415785         |
| bin.14 | <i>Firmicutes_A</i>     | <i>Clostridia</i>          | <i>Oscillospirales</i>     | <i>Ruminococcaceae</i>      | <i>Pygmaibacter</i>   | NA                  |
| bin.8  | <i>Actinobacteriota</i> | <i>Actinobacteria</i>      | <i>Actinomycetales</i>     | <i>Microbacteriaceae</i>    | <i>Microbacterium</i> | NA                  |
| bin.23 | <i>Actinobacteriota</i> | <i>Actinobacteria</i>      | <i>Actinomycetales</i>     | <i>Actinomycetaceae</i>     | KH17                  | NA                  |
| bin.20 | <i>Patescibacteria</i>  | <i>Gracilibacteria</i>     | BD1-5                      | UBA6164                     | UBA7396               | NA                  |
| bin.4  | <i>Patescibacteria</i>  | <i>Microgenomatia</i>      | UBA1406                    | GWC2-37-13                  | NA                    | NA                  |
| bin.19 | <i>Chloroflexota</i>    | <i>Anaerolineae</i>        | SBR1031                    | UBA2029                     | NA                    | NA                  |
| bin.28 | <i>Chloroflexota</i>    | <i>Anaerolineae</i>        | <i>Promineofilales</i>     | <i>Promineofilaceae</i>     | NA                    | NA                  |
| bin.6  | <i>Chloroflexota</i>    | <i>Chloroflexia</i>        | <i>Chloroflexales</i>      | <i>Chloroflexaceae</i>      | NA                    | NA                  |
| bin.24 | <i>Spirochaetota</i>    | <i>Spirochaetia</i>        | <i>Sphaerochaetales</i>    | <i>Sphaerochaetaceae</i>    | <i>Sphaerochaeta</i>  | NA                  |
| bin.22 | <i>Bacteroidota</i>     | <i>Bacteroidia</i>         | <i>Chitinophagales</i>     | ND                          | NA                    | NA                  |
| bin.7  | <i>Bacteroidota</i>     | <i>Rhodothermia</i>        | <i>Rhodothermales</i>      | MEBICO9517                  | NA                    | NA                  |
| bin.27 | <i>Proteobacteria</i>   | <i>Gammaproteobacteria</i> | <i>Xanthomonadales</i>     | <i>Wenzhouxiangellaceae</i> | GCA-2722315           | NA                  |
| bin.17 | <i>Proteobacteria</i>   | <i>Gammaproteobacteria</i> | NA                         | NA                          | NA                    | NA                  |
| bin.25 | <i>Proteobacteria</i>   | <i>Alphaproteobacteria</i> | <i>Rickettsiales</i>       | NA                          | NA                    | NA                  |
| bin.29 | <i>Firmicutes_A</i>     | <i>Clostridia</i>          | <i>Oscillospirales</i>     | <i>Oscillospiraceae</i>     | <i>Intestinimonas</i> | NA                  |
| bin.21 | <i>Firmicutes_A</i>     | <i>Clostridia</i>          | <i>Clostridiales</i>       | <i>Clostridiaceae</i>       | NA                    | NA                  |
| bin.2  | <i>Patescibacteria</i>  | <i>Saccharimonadia</i>     | <i>Saccharimonadales</i>   | SZUA-47                     | NA                    | NA                  |

---

|        |                         |                            |                          |                          |                      |    |
|--------|-------------------------|----------------------------|--------------------------|--------------------------|----------------------|----|
| bin.16 | <i>Proteobacteria</i>   | <i>Alphaproteobacteria</i> | <i>Rhizobiales</i>       | <i>Rhizobiaceae</i>      | <i>Marteella</i>     | NA |
| bin.26 | <i>Proteobacteria</i>   | <i>Alphaproteobacteria</i> | <i>Rhodobacterales</i>   | <i>Rhodobacteraceae</i>  | NA                   | NA |
| bin.9  | <i>Proteobacteria</i>   | <i>Alphaproteobacteria</i> | <i>Rhodobacterales</i>   | <i>Rhodobacteraceae</i>  | UBA996               | NA |
| bin.30 | <i>Proteobacteria</i>   | <i>Alphaproteobacteria</i> | <i>Rhodospirillales</i>  | <i>Thalassospiraceae</i> | <i>Thalassospira</i> | NA |
| bin.15 | <i>Proteobacteria</i>   | <i>Alphaproteobacteria</i> | <i>Rhodospirillales</i>  | <i>Thalassospiraceae</i> | <i>Thalassospira</i> | NA |
| bin.18 | <i>Campylobacterota</i> | <i>Campylobacteria</i>     | <i>Campylobacterales</i> | NA                       | NA                   | NA |
| bin.12 | <i>Campylobacterota</i> | <i>Campylobacteria</i>     | <i>Campylobacterales</i> | <i>Sulfurimonadaceae</i> | <i>Sulfurimonas</i>  | NA |

---

Unclassified Family/Genus/Species are indicated as 'NA', not available.

Table S5. Taxonomic assignment results of COR MAGs  
The taxonomic assignment results of COR MAGs via GTDB-tk.

| Genome | Phylum                    | Class                      | Order                     | Family                     | Genus                  | Species               |
|--------|---------------------------|----------------------------|---------------------------|----------------------------|------------------------|-----------------------|
| bin.46 | <i>Bacteroidota</i>       | <i>Bacteroidia</i>         | <i>Flavobacteriales</i>   | koll-22                    | UBA5081                | sp002415785           |
| bin.34 | <i>Proteobacteria</i>     | <i>Gammaproteobacteria</i> | <i>Francisellales</i>     | <i>Francisellaceae</i>     | <i>Allofrancisella</i> | <i>guangzhouensis</i> |
| bin.23 | <i>Patescibacteria</i>    | <i>Paceibacteria</i>       | UBA9983_A                 | UBA1006                    | UBA1006                | NA                    |
| bin.26 | <i>Patescibacteria</i>    | <i>Paceibacteria</i>       | UBA9983_A                 | UBA1006                    | UBA1006                | NA                    |
| bin.47 | <i>Patescibacteria</i>    | <i>Paceibacteria</i>       | UBA6257                   | UBA9933                    | WO2-47-17b             | NA                    |
| bin.10 | <i>Patescibacteria</i>    | ABY1                       | BM507                     | XYC2-FULL-47-12            | NA                     | NA                    |
| bin.30 | <i>Patescibacteria</i>    | <i>Microgenomatia</i>      | UBA1406                   | GWC2-37-13                 | NA                     | NA                    |
| bin.6  | <i>Chloroflexota</i>      | <i>Dehalococcoidia</i>     | <i>Dehalococcoidales</i>  | <i>Dehalococcoidaceae</i>  | <i>Dehalogenimonas</i> | NA                    |
| bin.31 | <i>Verrucomicrobiota</i>  | <i>Verrucomicrobiae</i>    | <i>Opitutales</i>         | UBA3534                    | NA                     | NA                    |
| bin.44 | <i>VerrucomicrobiotaA</i> | <i>Chlamydiia</i>          | <i>Parachlamydiales</i>   | <i>Simkaniaceae</i>        | <i>Simkania</i>        | NA                    |
| bin.63 | <i>VerrucomicrobiotaA</i> | <i>Chlamydiia</i>          | <i>Parachlamydiales</i>   | <i>Simkaniaceae</i>        | NA                     | NA                    |
| bin.37 | <i>Bacteroidota</i>       | <i>Bacteroidia</i>         | <i>Bacteroidales</i>      | <i>Marinilabiliaceae</i>   | <i>Marinilabilia</i>   | NA                    |
| bin.28 | <i>Bacteroidota</i>       | <i>Bacteroidia</i>         | <i>Flavobacteriales</i>   | <i>Cryomorphaceae</i>      | NA                     | NA                    |
| bin.7  | <i>Bacteroidota</i>       | <i>Bacteroidia</i>         | <i>Sphingobacteriales</i> | <i>Sphingobacteriaceae</i> | NA                     | NA                    |
| bin.51 | <i>Bacteroidota</i>       | <i>Bacteroidia</i>         | <i>Chitinophagales</i>    | <i>Chitinophagaceae</i>    | <i>Taibaiella_B</i>    | NA                    |
| bin.49 | <i>Proteobacteria</i>     | <i>Gammaproteobacteria</i> | <i>Enterobacterales</i>   | <i>Alteromonadaceae</i>    | <i>Idiomarina</i>      | NA                    |
| bin.3  | <i>Proteobacteria</i>     | <i>Gammaproteobacteria</i> | <i>Enterobacterales</i>   | <i>Alteromonadaceae</i>    | <i>Idiomarina</i>      | NA                    |
| bin.33 | <i>Proteobacteria</i>     | <i>Gammaproteobacteria</i> | UBA5158                   | UBA5158                    | 2-12-FULL-43-28        | NA                    |
| bin.62 | <i>Proteobacteria</i>     | <i>Gammaproteobacteria</i> | NA                        | NA                         | NA                     | NA                    |
| bin.55 | <i>Proteobacteria</i>     | <i>Gammaproteobacteria</i> | <i>Nitrococcales</i>      | NA                         | NA                     | NA                    |

|        |                         |                            |                            |                           |                             |                     |
|--------|-------------------------|----------------------------|----------------------------|---------------------------|-----------------------------|---------------------|
| bin.11 | <i>Proteobacteria</i>   | <i>Gammaproteobacteria</i> | <i>Nitrococcales</i>       | NA                        | NA                          | NA                  |
| bin.52 | <i>Proteobacteria</i>   | <i>Gammaproteobacteria</i> | <i>Nitrococcales</i>       | NA                        | NA                          | NA                  |
| bin.14 | <i>Proteobacteria</i>   | <i>Gammaproteobacteria</i> | <i>Nitrococcales</i>       | NA                        | NA                          | NA                  |
| bin.22 | <i>Proteobacteria</i>   | <i>Gammaproteobacteria</i> | <i>Burkholderiales</i>     | <i>Burkholderiaceae</i>   | <i>Pusillimonas</i>         | NA                  |
| bin.5  | <i>Proteobacteria</i>   | <i>Alphaproteobacteria</i> | <i>Rhizobiales</i>         | <i>Rhizobiaceae</i>       | <i>Pararhizobium_A</i>      | NA                  |
| bin.48 | <i>Proteobacteria</i>   | <i>Alphaproteobacteria</i> | <i>Rhizobiales</i>         | <i>Amorphaceae</i>        | <i>Amorphus</i>             | NA                  |
| bin.57 | <i>Proteobacteria</i>   | <i>Alphaproteobacteria</i> | <i>Rhizobiales</i>         | <i>Methylophilaceae</i>   | Ga0077545                   | NA                  |
| bin.43 | <i>Proteobacteria</i>   | <i>Alphaproteobacteria</i> | <i>Parvibaculales</i>      | <i>Parvibaculaceae</i>    | <i>Parvibaculum</i>         | NA                  |
| bin.18 | <i>Proteobacteria</i>   | <i>Alphaproteobacteria</i> | <i>Sphingomonadales</i>    | <i>Sphingomonadaceae</i>  | <i>Altererythrobacter_A</i> | NA                  |
| bin.40 | <i>Proteobacteria</i>   | <i>Alphaproteobacteria</i> | <i>Sphingomonadales</i>    | <i>Sphingomonadaceae</i>  | <i>Sphingopyxis</i>         | NA                  |
| bin.54 | <i>Proteobacteria</i>   | <i>Alphaproteobacteria</i> | Bin95                      | Bin95                     | NA                          | NA                  |
| bin.20 | <i>Proteobacteria</i>   | <i>Alphaproteobacteria</i> | <i>Micavibrionales</i>     | UBA2020                   | NA                          | NA                  |
| bin.42 | <i>Proteobacteria</i>   | <i>Alphaproteobacteria</i> | UBA8366                    | GCA-2696645               | NA                          | NA                  |
| bin.41 | <i>Proteobacteria</i>   | <i>Alphaproteobacteria</i> | UBA8366                    | GCA-2696645               | NA                          | NA                  |
| bin.8  | <i>Proteobacteria</i>   | <i>Alphaproteobacteria</i> | NA                         | NA                        | NA                          | NA                  |
| bin.15 | <i>Proteobacteria</i>   | <i>Gammaproteobacteria</i> | <i>Pseudomonadales</i>     | <i>Oleiphilaceae</i>      | <i>Marinobacter</i>         | <i>subterrani</i>   |
| bin.59 | <i>Proteobacteria</i>   | <i>Gammaproteobacteria</i> | <i>Francisellales</i>      | <i>Francisellaceae</i>    | <i>Francisella</i>          | <i>hispaniensis</i> |
| bin.36 | <i>Proteobacteria</i>   | <i>Gammaproteobacteria</i> | <i>Thiomicrospirales</i>   | <i>Thiomicrospiraceae</i> | <i>Hydrogenovibrio</i>      | sp000711305         |
| bin.56 | <i>Proteobacteria</i>   | <i>Alphaproteobacteria</i> | <i>Rhodobacterales</i>     | <i>Rhodobacteraceae</i>   | <i>Thioclava</i>            | <i>marina</i>       |
| bin.17 | <i>FirmicutesI</i>      | <i>Bacilli_A</i>           | <i>Paenibacillales</i>     | <i>Paenibacillaceae</i>   | NA                          | NA                  |
| bin.39 | <i>FirmicutesI</i>      | <i>Bacilli_A</i>           | <i>Paenibacillales</i>     | NA                        | NA                          | NA                  |
| bin.45 | <i>Actinobacteriota</i> | <i>Actinobacteria</i>      | <i>Actinomycetales</i>     | <i>Microbacteriaceae</i>  | <i>Yonghaparkia</i>         | NA                  |
| bin.2  | <i>Actinobacteriota</i> | <i>Actinobacteria</i>      | <i>Actinomycetales</i>     | <i>Microbacteriaceae</i>  | 73-13                       | NA                  |
| bin.25 | <i>Actinobacteriota</i> | <i>Actinobacteria</i>      | <i>Actinomycetales</i>     | <i>Microbacteriaceae</i>  | <i>Microbacterium</i>       | NA                  |
| bin.13 | <i>Actinobacteriota</i> | <i>Actinobacteria</i>      | <i>Propionibacteriales</i> | <i>Nocardiodaceae</i>     | <i>Aeromicrobium</i>        | NA                  |

|        |                       |                            |                           |                           |                         |    |
|--------|-----------------------|----------------------------|---------------------------|---------------------------|-------------------------|----|
| bin.24 | <i>Bacteroidota</i>   | <i>Bacteroidia</i>         | <i>Flavobacteriales</i>   | <i>Flavobacteriaceae</i>  | NA                      | NA |
| bin.29 | <i>Bacteroidota</i>   | <i>Bacteroidia</i>         | <i>Flavobacteriales</i>   | <i>Flavobacteriaceae</i>  | <i>Galbibacter</i>      | NA |
| bin.60 | <i>Bacteroidota</i>   | <i>Bacteroidia</i>         | <i>Flavobacteriales</i>   | <i>Flavobacteriaceae</i>  | <i>Flavobacterium</i>   | NA |
| bin.32 | <i>Bacteroidota</i>   | <i>Bacteroidia</i>         | <i>Flavobacteriales</i>   | <i>Flavobacteriaceae</i>  | <i>Flavobacterium_A</i> | NA |
| bin.27 | <i>Bacteroidota</i>   | <i>Bacteroidia</i>         | <i>Flavobacteriales</i>   | <i>Crocinitomicaceae</i>  | UBA5422                 | NA |
| bin.61 | <i>Bacteroidota</i>   | <i>Kapabacteria</i>        | <i>Kapabacteriales</i>    | GCA-002839825             | PGYR01                  | NA |
| bin.50 | <i>Proteobacteria</i> | <i>Gammaproteobacteria</i> | <i>Enterobacteriales</i>  | <i>Alteromonadaceae</i>   | <i>Idiomarina</i>       | NA |
| bin.4  | <i>Proteobacteria</i> | <i>Gammaproteobacteria</i> | <i>Legionellales</i>      | <i>Legionellaceae</i>     | <i>Legionella_D</i>     | NA |
| bin.58 | <i>Proteobacteria</i> | <i>Gammaproteobacteria</i> | <i>Legionellales</i>      | <i>Legionellaceae</i>     | <i>Legionella_A</i>     | NA |
| bin.53 | <i>Proteobacteria</i> | <i>Gammaproteobacteria</i> | <i>Thiomicrospirales</i>  | <i>Thiomicrospiraceae</i> | <i>Hydrogenovibrio</i>  | NA |
| bin.12 | <i>Proteobacteria</i> | <i>Gammaproteobacteria</i> | <i>Burkholderiales</i>    | <i>Burkholderiaceae</i>   | <i>Candidimonas</i>     | NA |
| bin.38 | <i>Proteobacteria</i> | <i>Gammaproteobacteria</i> | <i>Burkholderiales</i>    | <i>Burkholderiaceae</i>   | <i>Candidimonas</i>     | NA |
| bin.35 | <i>Proteobacteria</i> | <i>Gammaproteobacteria</i> | <i>Burkholderiales</i>    | <i>Burkholderiaceae</i>   | NA                      | NA |
| bin.19 | <i>Proteobacteria</i> | <i>Gammaproteobacteria</i> | <i>Burkholderiales</i>    | <i>Burkholderiaceae</i>   | NA                      | NA |
| bin.16 | <i>Proteobacteria</i> | <i>Alphaproteobacteria</i> | <i>Rhizobiales</i>        | <i>Rhizobiaceae</i>       | <i>Aquamicrobium_A</i>  | NA |
| bin.21 | <i>Proteobacteria</i> | <i>Alphaproteobacteria</i> | <i>Rhizobiales</i>        | <i>Rhizobiaceae</i>       | <i>Aliihoeflea</i>      | NA |
| bin.9  | <i>Proteobacteria</i> | <i>Alphaproteobacteria</i> | <i>Rhodobacterales</i>    | <i>Rhodobacteraceae</i>   | NA                      | NA |
| bin.64 | <i>Proteobacteria</i> | <i>Alphaproteobacteria</i> | <i>Rhodospirillales_A</i> | <i>Thalassospiraceae</i>  | <i>Thalassospira</i>    | NA |

Unclassified Order/Family/Genus/Species are indicated as 'NA', not available.



Table S6. The distribution of dehalogenase in MAGs  
Gene numbers of four types of dehalogenases in different MAGs.

| Genome                         | 2-haloacid<br>dehalogenase | haloacetate<br>dehalogenase | haloalkane<br>dehalogenase | 4-chlorobenzoyl<br>coenzyme A dehalogenase |
|--------------------------------|----------------------------|-----------------------------|----------------------------|--------------------------------------------|
| AT_Chloroflexaceae_bin.6       | 1                          | 3                           | 2                          | 0                                          |
| AT_Rhodothermales_bin.7        | 0                          | 1                           | 4                          | 0                                          |
| AT_Microbacterium_bin.8        | 0                          | 1                           | 0                          | 1                                          |
| AT_Rhodobacteraceae_bin.9      | 1                          | 1                           | 0                          | 2                                          |
| AT_Thalassospira_bin.15        | 1                          | 1                           | 0                          | 0                                          |
| AT_Martelevia_bin.16           | 0                          | 2                           | 0                          | 0                                          |
| AT_Anaerolineae_bin.19         | 0                          | 1                           | 1                          | 0                                          |
| AT_Rhodobacteraceae_bin.26     | 1                          | 1                           | 0                          | 0                                          |
| AT_Wenzhouxiangellaceae_bin.27 | 0                          | 0                           | 1                          | 0                                          |
| AT_Promineofilaceae_bin.28     | 1                          | 1                           | 2                          | 1                                          |
| AT_Thalassospira_bin.30        | 1                          | 0                           | 0                          | 0                                          |
| COR_Idiomarina_bin.3           | 0                          | 0                           | 1                          | 1                                          |
| COR_Pararhizobium_bin.5        | 2                          | 1                           | 0                          | 0                                          |
| COR_Rhodobacteraceae_bin.9     | 1                          | 1                           | 0                          | 0                                          |
| COR_Nitrococcales_bin.11       | 1                          | 2                           | 0                          | 0                                          |
| COR_Candidimonas_bin.12        | 2                          | 0                           | 0                          | 0                                          |
| COR_Nitrococcales_bin.14       | 1                          | 0                           | 2                          | 1                                          |
| COR_Marinobacter_bin.15        | 1                          | 0                           | 2                          | 0                                          |
| COR_Aquamicrobium_bin.16       | 1                          | 1                           | 2                          | 0                                          |
| COR_Altererythrobacter_bin.18  | 0                          | 1                           | 0                          | 0                                          |
| COR_Burkholderiaceae_bin.19    | 2                          | 2                           | 0                          | 0                                          |
| COR_Rhizobiaceae_bin.21        | 1                          | 0                           | 0                          | 1                                          |
| COR_Pusillimonas_bin.22        | 1                          | 0                           | 1                          | 0                                          |
| COR_Microbacterium_bin.25      | 0                          | 1                           | 0                          | 1                                          |
| COR_Opitutales_bin.31          | 0                          | 0                           | 1                          | 0                                          |
| COR_UBA5158_bin.33             | 0                          | 1                           | 1                          | 0                                          |
| COR_Marinilabilia_bin.37       | 2                          | 0                           | 0                          | 0                                          |
| COR_Candidimonas_bin.38        | 3                          | 0                           | 0                          | 0                                          |
| COR_Sphingopyxis_bin.40        | 0                          | 1                           | 0                          | 0                                          |
| COR_UBA8366_bin.41             | 1                          | 1                           | 0                          | 0                                          |
| COR_UBA8366_bin.42             | 1                          | 1                           | 0                          | 0                                          |
| COR_Parvibaculum_bin.43        | 0                          | 0                           | 1                          | 0                                          |
| COR_Simkania_bin.44            | 0                          | 0                           | 1                          | 0                                          |
| COR_Yonghaparkia_bin.45        | 0                          | 0                           | 1                          | 0                                          |
| COR_Amorphus_bin.48            | 1                          | 2                           | 0                          | 1                                          |
| COR_Idiomarina_bin.49          | 0                          | 1                           | 1                          | 0                                          |

---

|                              |   |   |   |   |
|------------------------------|---|---|---|---|
| COR_Idiomarina_bin.50        | 0 | 0 | 1 | 0 |
| COR_Nitrococcales_bin.52     | 0 | 1 | 0 | 1 |
| COR_Bin95_bin.54             | 3 | 1 | 4 | 0 |
| COR_Nitrococcales_bin.55     | 0 | 1 | 1 | 0 |
| COR_Thioclava_bin.56         | 2 | 1 | 0 | 0 |
| COR_Thalassospiraceae_bin.64 | 1 | 0 | 0 | 0 |

---

Table S7. The significantly different metabolism pathways between locations  
 The significantly different metabolism pathways between locations based on the  
 non-targeted metabolomics data.

|        | <b>Pathway Name</b>                             | <b>Pathway ID</b> | <b>Pvalue</b> | <b>Compounds</b>                                            |
|--------|-------------------------------------------------|-------------------|---------------|-------------------------------------------------------------|
| RW/AT  | Tyrosine metabolism                             | edi00350          | 0.0238        | C03964 (R)-3-(4-Hydroxyphenyl) lactate;<br>C00042 Succinate |
| RW/AT  | Oxidative phosphorylation                       | edi00190          | 0.049         | C00042 Succinate                                            |
| AT/COR | Tyrosine metabolism                             | edi00350          | 0.00498       | C03964 (R)-3-(4-Hydroxyphenyl) lactate;<br>C00042 Succinate |
| AT/COR | Oxidative phosphorylation                       | edi00190          | 0.0229        | C00042 Succinate                                            |
| AT/COR | Pantothenate and CoA<br>biosynthesis            | edi00770          | 0.0398        | C01053 (R)-4-Dehydropantoate                                |
| AT/COR | Alanine, aspartate, and<br>glutamate metabolism | edi00250          | 0.0398        | C00042 Succinate                                            |
| AT/COR | Pyruvate metabolism                             | edi00620          | 0.044         | C00042 Succinate                                            |
| AT/COR | Sulfur metabolism                               | edi00920          | 0.0468        | C00042 Succinate                                            |

Table S8. The antibiotic resistance ontology of the MAGs.

The potential ARO genes of the MAGs were predicted via RGI and CARD.

| MAG        | Taxonomy_MAG             | Name        | ARO     | Resistance Mechanism         |
|------------|--------------------------|-------------|---------|------------------------------|
| AT_bin.12  | <i>Campylobacterales</i> | <i>qacJ</i> | 3007014 | antibiotic efflux            |
| AT_bin.14  | <i>Oscillospirale</i>    | <i>nimI</i> | 3007111 | antibiotic inactivation      |
| AT_bin.15  | <i>Rhodospirillales</i>  | <i>qacJ</i> | 3007014 | antibiotic efflux            |
| AT_bin.16  | <i>Rhizobiales</i>       | <i>adeF</i> | 3000777 | antibiotic efflux            |
| AT_bin.16  | <i>Rhizobiales</i>       | <i>qacJ</i> | 3007014 | antibiotic efflux            |
| AT_bin.21  | <i>Clostridiales</i>     | <i>vanR</i> | 3003728 | antibiotic target alteration |
| AT_bin.21  | <i>Clostridiales</i>     | <i>gyrB</i> | 3004562 | antibiotic target alteration |
| AT_bin.26  | <i>Rhodobacterales</i>   | <i>qacG</i> | 3007015 | antibiotic efflux            |
| AT_bin.30  | <i>Rhodospirillales</i>  | <i>qacJ</i> | 3007014 | antibiotic efflux            |
| AT_bin.30  | <i>Rhodospirillales</i>  | <i>adeF</i> | 3000777 | antibiotic efflux            |
| AT_bin.30  | <i>Rhodospirillales</i>  | <i>adeF</i> | 3000777 | antibiotic efflux            |
| COR_bin.5  | <i>Rhizobiales</i>       | <i>qacG</i> | 3007015 | antibiotic efflux            |
| COR_bin.9  | <i>Rhodobacterales</i>   | <i>qacG</i> | 3007015 | antibiotic efflux            |
| COR_bin.12 | <i>Burkholderiales</i>   | <i>qacG</i> | 3007015 | antibiotic efflux            |
| COR_bin.12 | <i>Burkholderiales</i>   | <i>adeF</i> | 3000777 | antibiotic efflux            |
| COR_bin.12 | <i>Burkholderiales</i>   | <i>qacG</i> | 3007015 | antibiotic efflux            |
| COR_bin.14 | <i>Nitrococcales</i>     | <i>adeF</i> | 3000777 | antibiotic efflux            |
| COR_bin.15 | <i>Pseudomonadales</i>   | <i>rsmA</i> | 3005069 | antibiotic efflux            |
| COR_bin.15 | <i>Pseudomonadales</i>   | <i>qacG</i> | 3007015 | antibiotic efflux            |
| COR_bin.16 | <i>Rhizobiales</i>       | <i>qacG</i> | 3007015 | antibiotic efflux            |
| COR_bin.19 | <i>Burkholderiales</i>   | <i>adeF</i> | 3000777 | antibiotic efflux            |
| COR_bin.19 | <i>Burkholderiales</i>   | <i>qacG</i> | 3007015 | antibiotic efflux            |
| COR_bin.21 | <i>Rhizobiales</i>       | <i>qacG</i> | 3007015 | antibiotic efflux            |
| COR_bin.22 | <i>Burkholderiales</i>   | <i>qacG</i> | 3007015 | antibiotic efflux            |
| COR_bin.27 | <i>Flavobacteriales</i>  | <i>adeF</i> | 3000777 | antibiotic efflux            |
| COR_bin.29 | <i>Flavobacteriales</i>  | <i>adeF</i> | 3000777 | antibiotic efflux            |
| COR_bin.31 | <i>Opitutales</i>        | <i>adeF</i> | 3000777 | antibiotic efflux            |
| COR_bin.35 | <i>Burkholderiales</i>   | <i>adeF</i> | 3000777 | antibiotic efflux            |
| COR_bin.35 | <i>Burkholderiales</i>   | <i>adeF</i> | 3000777 | antibiotic efflux            |
| COR_bin.35 | <i>Burkholderiales</i>   | <i>qacG</i> | 3007015 | antibiotic efflux            |
| COR_bin.36 | <i>Thiomicrospirales</i> | <i>adeF</i> | 3000777 | antibiotic efflux            |
| COR_bin.36 | <i>Thiomicrospirales</i> | <i>adeF</i> | 3000777 | antibiotic efflux            |
| COR_bin.38 | <i>Burkholderiales</i>   | <i>qacJ</i> | 3007014 | antibiotic efflux            |
| COR_bin.38 | <i>Burkholderiales</i>   | <i>qacG</i> | 3007015 | antibiotic efflux            |
| COR_bin.40 | <i>Sphingomonadales</i>  | <i>adeF</i> | 3000777 | antibiotic efflux            |
| COR_bin.40 | <i>Sphingomonadales</i>  | <i>adeF</i> | 3000777 | antibiotic efflux            |
| COR_bin.43 | <i>Parvibaculales</i>    | <i>adeF</i> | 3000777 | antibiotic efflux            |
| COR_bin.48 | <i>Rhizobiales</i>       | <i>qacG</i> | 3007015 | antibiotic efflux            |
| COR_bin.49 | <i>Enterobacteriales</i> | <i>rsmA</i> | 3005069 | antibiotic efflux            |

---

|            |                          |             |         |                   |
|------------|--------------------------|-------------|---------|-------------------|
| COR_bin.50 | <i>Enterobacteriales</i> | <i>rsmA</i> | 3005069 | antibiotic efflux |
| COR_bin.52 | <i>Nitrococcales</i>     | <i>adeF</i> | 3000777 | antibiotic efflux |
| COR_bin.53 | <i>Thiomicrospirales</i> | <i>adeF</i> | 3000777 | antibiotic efflux |
| COR_bin.55 | <i>Nitrococcales</i>     | <i>adeF</i> | 3000777 | antibiotic efflux |
| COR_bin.56 | <i>Rhodobacterales</i>   | <i>qacG</i> | 3007015 | antibiotic efflux |
| COR_bin.57 | <i>Rhizobiales</i>       | <i>adeF</i> | 3000777 | antibiotic efflux |
| COR_bin.59 | <i>Francisellales</i>    | <i>qacJ</i> | 3007014 | antibiotic efflux |
| COR_bin.60 | <i>Flavobacteriales</i>  | <i>adeF</i> | 3000777 | antibiotic efflux |
| COR_bin.60 | <i>Flavobacteriales</i>  | <i>adeF</i> | 3000777 | antibiotic efflux |
| COR_bin.64 | <i>Rhodospirillales</i>  | <i>adeF</i> | 3000777 | antibiotic efflux |
| COR_bin.64 | <i>Rhodospirillales</i>  | <i>qacJ</i> | 3007014 | antibiotic efflux |
| COR_bin.64 | <i>Rhodospirillales</i>  | <i>adeF</i> | 3000777 | antibiotic efflux |

---
